# Supplementary material for: NO2 Sensing Behavior of Compacted Chemically Treated Multi-Walled Carbon Nanotubes
Source: MDPI journal article supplement (doi:10.3390/mi13091495), 2022-09-08
Supplement: s1 [file s1]

Article

# NO<sub>2</sub> sensing behavior of compacted chemically treated multi-walled carbon nanotubes

Nikita I. Lapekin<sup>1</sup>, Valeriy V. Golovakhin<sup>1</sup>, Ekaterina Yu. Kim<sup>1</sup> and Alexander G. Bannov<sup>1,\*</sup>

<sup>1</sup> Department of Chemistry and Chemical Engineering, Novosibirsk State Technical University, 630073 Novosibirsk, Russia

\* Correspondence: bannov.alexander@gmail.com

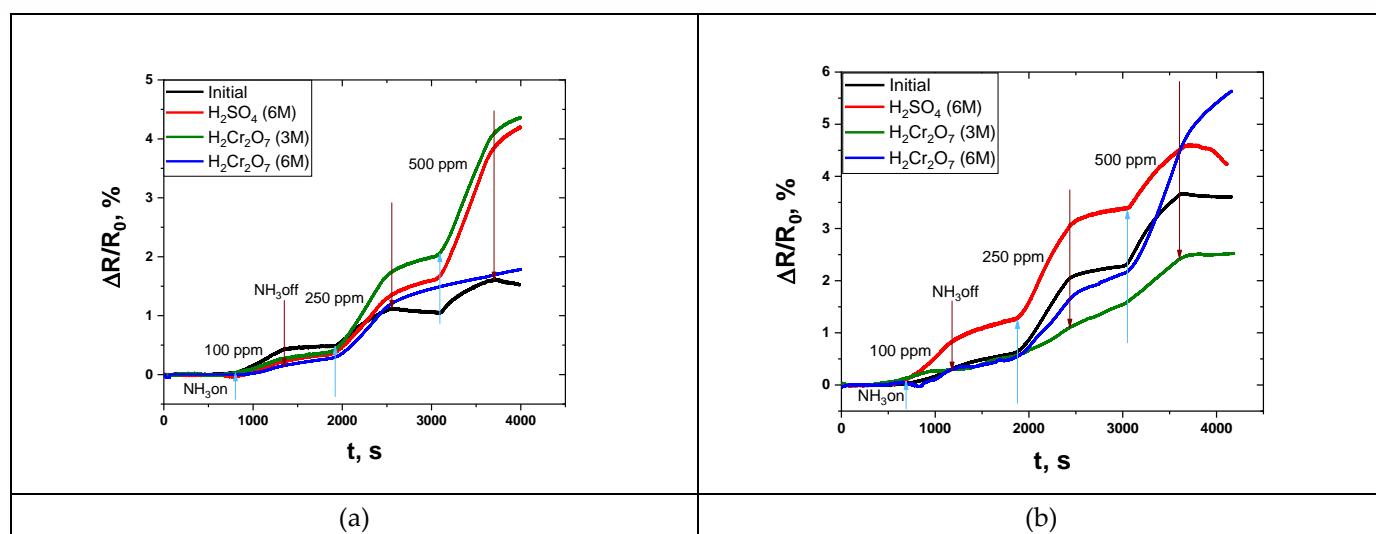

**Figure S1.** Response of pure and treated MWNT-1020 (a) and MWNT-4060 (b) to 100–500 ppm NH<sub>3</sub> at room temperature (25±2°C)

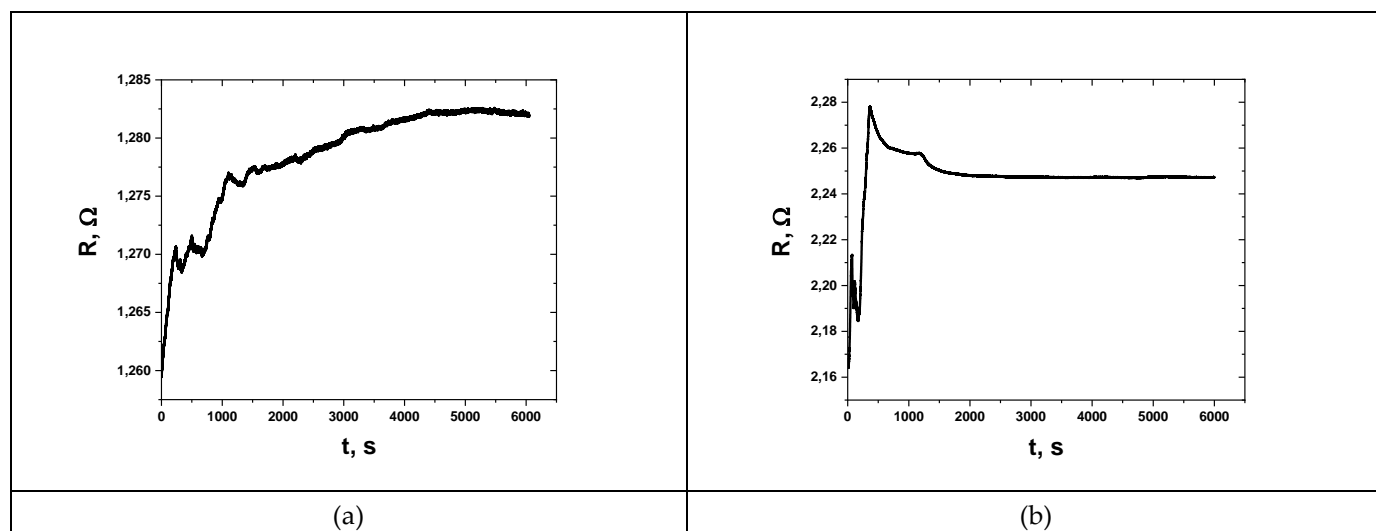

**Figure S2.** Resistance of pure MWNT-1020 (a) and MWNT-4060 (b) to 100–500 ppm CH<sub>4</sub> at room temperature (25±2°C)
